# Supplementary material
Source: publisher figshare collection journal article supplement (https://brill.figshare.com/ndownloader/files/15190433)
Supplement: Supplementary file 1 [file 15190433]

# **Analysing the Impact of Music on the Perception of Red Wine via Temporal Dominance of Sensations**

**Qian Janice Wang**<sup>1,2,\*</sup>, **Bruno Mesz**<sup>3</sup>, **Pablo Riera**<sup>4</sup>, **Marcos Trevisan**<sup>5</sup>, **Mariano Sigman**<sup>6,7</sup>, **Apratim Guha**<sup>8</sup> and **Charles Spence**<sup>1</sup>

<sup>1</sup> Crossmodal Research Laboratory, Department of Experimental Psychology, Oxford University,  
Oxford, UK

<sup>2</sup> Department of Food Science, Aarhus University, Aarslev, Denmark

<sup>3</sup> MUNTREF Tecnópolis, Universidad Nacional de Tres de Febrero, Buenos Aires, Argentina

<sup>4</sup> Laboratorio de Inteligencia Artificial Aplicada, Instituto de Ciencias de la Computación,  
Universidad de Buenos Aires, CONICET, Argentina

<sup>5</sup> Department of Physics, University of Buenos Aires and Institute of Physics Buenos Aires  
(IFIBA), CONICET, Argentina

<sup>6</sup> Laboratorio de Neurociencia, CONICET, Universidad Torcuato Di Tella, C1428BIJ Buenos  
Aires, Argentina

<sup>7</sup> Facultad de Lenguas y Educación, Universidad Nebrija, Madrid, Spain

<sup>8</sup> Production, Operations and Decision Sciences Area, XLRI, Xavier School of Management,  
Jamshedpur, India

Received 7 January 2019; accepted 29 March 2019

\* To whom correspondence should be addressed. E-mail: qianjanice.wang@food.au.dk

## Supplementary Material

### Definition of Sound Attributes

*Pitch:* Pitch is one of the primary auditory sensations, along with loudness and timbre. In music, sequences of pitch define melody, and simultaneous combinations of pitches define harmony. It is the perceptual correlate of the periodicity, or repetition rate, of an acoustic waveform (Oxenham, 2012).

*Timbre:* sometimes referred to as sound colour, texture, or tone quality, mainly correlates with the spectro-temporal shape of the audio signal. It is one of the primary perceptual vehicles for the recognition, identification, and tracking over time of a sound source (e.g., singer's voice, clarinet, set of carillon bells) (McAdams and Giordano, 2009).

*Spectral Centroid:* a quantity correlated with the perceptual brightness of sound. It is calculated as a weighted mean of the frequencies present in the musical signal (Grey and Gordon, 1978).

*Root Mean Squared Energy (RMSE):* the sensation of loudness is related to sound energy by Stevens' law (Moore, 2013).

## **Musical Novelty Detection**

We use a musical novelty detection technique (Foote, 2000) to have a systematic way for accounting salient musical events or boundaries of musical segments. The technique involves three steps. The first step concerns transforming the sound signal to a features time series that captures the desired sound characteristic to be analysed. In this case, we wanted to capture the instrumentations changes in the Mussorgsky soundtrack and the sound textures in the Eno. For this, we use the MFCC (Mel Frequency Cepstral Coefficients) sound descriptor that is known to be correlated with musical timbre (Siedenburg *et al.*, 2016). The second step involves creating a recurrence matrix. This is done by building a matrix where the elements indicate how different two moments of the sound are by computing the distance between every pair of points in time of the sound descriptor. This recurrence matrix often has a block-like structure in the principal diagonal that indicates autosimilar fragments of music, for example having the same arrangement, dynamic or other musical aspect. The final step consists in inspecting the matrix with an edge detection kernel to measure whether this block-like structure changes, by convolving the kernel along with the principal diagonal. The output is a continuous curve that states the amount of novelty for every time frame and has sharp peaks when salient events or transitions occur.

## Taste Curves and Music Videos

Two videos were rendered to show the taste curves with the music and they are available at:

<https://www.dropbox.com/s/oltc2h4d9nogzjr/eno.mp4?dl=0>

<https://www.dropbox.com/s/d64on02gnfvftlg/musso.mp4?dl=0>

## References

- Foote, J. (2000). Automatic audio segmentation using a measure of audio novelty, *Proc. (IEEE Int. Conf. Multimed. Expo)*, 452–455.
- Grey, J. M. and Gordon, J. W. (1978). Perceptual effects of spectral modifications on musical timbres, *J. Acoust. Soc. Am.*, **63**, 1493–1500.
- McAdams, S. and Giordano, B. L. (2009). The perception of musical timbre, in: *The Oxford Handbook of Music Psychology*, S. Hallam, I. Cross and M. Thaut (Eds), pp. 72–80. Oxford University Press, Oxford, UK.
- Moore, B. C. (2013). *An Introduction to the Psychology of Hearing*. Brill, Leiden, The Netherlands.
- Oxenham, A. J. (2012). Pitch perception, *J. Neurosci.*, **32**, 13335–13338.
- Siedenburg, K., Fujinaga, I. and McAdams, S. (2016). A comparison of approaches to timbre descriptors in music information retrieval and music psychology, *J. New Music Res.*, **45**, 27–41.
